# Supplementary material for: The „General Practice Class“ – an eligible compulsory course in undergraduate medical education: Didactical structure, teaching targets and implementation
Source: PubMed Central journal article supplement — GMS Z Med Ausbild. 2012 Nov 15;29(5):Doc67. doi: 10.3205/zma000837 (PMC3525912; doi:10.3205/zma000837), 2012-11-15
Supplement: ZMA-29-67-s-001.pdf [file ZMA-29-67-s-001.pdf]

**Table 1: Excerpt from the Curriculum for the General Practice Class (Preclinic)**

| Semester | Seminar topic                                                             | Curricular content                                                                                                                                                                                                                                                                                                                                                                                                                                                                                                                                                                                                                                                                                                        |
|----------|---------------------------------------------------------------------------|---------------------------------------------------------------------------------------------------------------------------------------------------------------------------------------------------------------------------------------------------------------------------------------------------------------------------------------------------------------------------------------------------------------------------------------------------------------------------------------------------------------------------------------------------------------------------------------------------------------------------------------------------------------------------------------------------------------------------|
| 1        | Communication Training: Principles of conducting talks                    | <ul style="list-style-type: none"> <li>• Analysis of and reflection on students' own conversational behavior</li> <li>• Learning of communication strategies that promote interaction</li> <li>• Awareness of the conditions, goals, and forms of conversation</li> <li>• Feedback as a form of "nonviolent" response</li> </ul>                                                                                                                                                                                                                                                                                                                                                                                          |
| 1        | Skills Training: Organization and structure of a private medical practice | <p>Introduction to:</p> <ul style="list-style-type: none"> <li>• Basic knowledge of the structures of the German healthcare system and the ability to recognize conflicts between patient expectations and the role of the statutory health insurance physician</li> <li>• Awareness of the different aspects of the roles of the general practitioner in the healthcare system (functions) and in contact with patients</li> <li>• Basic knowledge of the structure of a private general practice and the associated diagnostic and therapeutic possibilities; ability to identify sources of error</li> <li>• Understanding the conditions and mode of operation of the medical practice as a small business</li> </ul> |
| 1        | General Practice Case Reflection                                          | <p>Definition of general practice</p> <ul style="list-style-type: none"> <li>• Need for a bio-psycho-social model</li> <li>• Familiarization with various</li> </ul>                                                                                                                                                                                                                                                                                                                                                                                                                                                                                                                                                      |

|   |                                                                            |                                                                                                                                                                                                                                                                                                                                                                                                                                                                                           |
|---|----------------------------------------------------------------------------|-------------------------------------------------------------------------------------------------------------------------------------------------------------------------------------------------------------------------------------------------------------------------------------------------------------------------------------------------------------------------------------------------------------------------------------------------------------------------------------------|
|   |                                                                            | <p>concepts, such as reasons for seeking consultation, "individual" and "shared" reality</p>                                                                                                                                                                                                                                                                                                                                                                                              |
| 1 | <p>Days at the teaching practice</p>                                       | <ul style="list-style-type: none"> <li>• Familiarization with practice organization and procedures (registration, lab, consultation, special treatments, house visits)</li> <li>• <b>Long-term monitoring:</b> Familiarization with a chronically diseased patient/married couple during consultation or house visit and recording of the medical history</li> </ul>                                                                                                                      |
| 2 | <p>Communication Training:<br/>Types of questions</p>                      | <ul style="list-style-type: none"> <li>• The question as an instrument of medical diagnosis</li> <li>• Types of questions, their advantages, disadvantages and effects</li> <li>• Reflection on the students' own style of questioning</li> <li>• Use of different types of questions in specific situations</li> </ul>                                                                                                                                                                   |
| 2 | <p>Skills Training:<br/>Frequent clinical pictures – the “common cold”</p> | <ul style="list-style-type: none"> <li>• Identification of typical main symptoms of upper and lower respiratory infections during anamnesis and inspection</li> <li>• Targeted anamnesis and problem-oriented physical examination to differentiate “wait and watch” cases from “avertible dangerous courses of disease” regarding respiratory tract + paranasal sinus infections</li> <li>• Basic techniques for speaking about and verifying therapy with the patient in the</li> </ul> |

|   |                                                     |                                                                                                                                                                                                                                                                                                                                                                                                                                                                       |
|---|-----------------------------------------------------|-----------------------------------------------------------------------------------------------------------------------------------------------------------------------------------------------------------------------------------------------------------------------------------------------------------------------------------------------------------------------------------------------------------------------------------------------------------------------|
|   |                                                     | <p>case of the common cold</p> <ul style="list-style-type: none"> <li>• Evaluation of ability to work and communication of preventive measures</li> </ul>                                                                                                                                                                                                                                                                                                             |
| 2 | General Practice Case Reflection                    | <ul style="list-style-type: none"> <li>• Discussion of "integrated medicine" using case example 1 (long-term monitoring)</li> <li>• Theory and practice of anamnesis</li> <li>• 7 dimensions of a symptom</li> </ul>                                                                                                                                                                                                                                                  |
| 2 | Days at the teaching practice                       | <ul style="list-style-type: none"> <li>• Participation in a consultation in particular regard to the clinical picture of the "common cold"</li> <li>• Acquisition of simple examination techniques, e.g. inspection of throat, measuring blood pressure</li> <li>• Independent examination of 3 patients with a common cold and discussion of the results with the mentor</li> <li>• Long-term monitoring: in-depth case history, treatment of the patient</li> </ul> |
| 3 | Communication Training: Explanation & Description I | <ul style="list-style-type: none"> <li>• Familiarization with and differentiation of various forms of explanation (inductive, deductive, chronological, ...)</li> <li>• Student testing and analysis of own abilities to explain and describe</li> <li>• Familiarization with and practice of basic behavior and communication styles and strategies for optimal explanation</li> </ul>                                                                               |

|   |                                          |                                                                                                                                                                                                                                                                                                                                                                                                                                                                                                                                                                                                         |
|---|------------------------------------------|---------------------------------------------------------------------------------------------------------------------------------------------------------------------------------------------------------------------------------------------------------------------------------------------------------------------------------------------------------------------------------------------------------------------------------------------------------------------------------------------------------------------------------------------------------------------------------------------------------|
| 3 | Skills Training:<br>Gastrointestinal flu | <ul style="list-style-type: none"> <li>• Identification of typical main symptoms of inflammatory and non-inflammatory diseases of the abdomen during anamnesis and examination</li> <li>• Targeted anamnesis and problem-oriented physical examination to differentiate “wait and watch” cases from “avertible dangerous courses of disease” regarding stomach flu</li> <li>• Basic techniques for speaking about and verifying therapy with the patient in the case of “gastroenteritis”</li> <li>• Explanation + emphasizing of prevention measures and early recognition of complications</li> </ul> |
| 3 | General Practice Case Reflection         | <ul style="list-style-type: none"> <li>• Shared case reflection</li> <li>• Theory of patient perception of disease, interview on social environment</li> <li>• Joint role playing to practice interviewing</li> </ul>                                                                                                                                                                                                                                                                                                                                                                                   |
| 3 | Days at the teaching practice            | <ul style="list-style-type: none"> <li>• Case issues involving gastrointestinal infections</li> <li>• Student observation with particular emphasis on implementing the practical examination techniques learned in the seminar concerning this clinical picture</li> <li>• Long-term monitoring: in-depth case history, treatment of the patient</li> </ul>                                                                                                                                                                                                                                             |
| 4 | Communication Training: Explanation &    | <ul style="list-style-type: none"> <li>• Repetition and solidification of Communication Training,</li> </ul>                                                                                                                                                                                                                                                                                                                                                                                                                                                                                            |

|   |                                  |                                                                                                                                                                                                                                                                                                                                                                                                                                                                                                                                                                                   |
|---|----------------------------------|-----------------------------------------------------------------------------------------------------------------------------------------------------------------------------------------------------------------------------------------------------------------------------------------------------------------------------------------------------------------------------------------------------------------------------------------------------------------------------------------------------------------------------------------------------------------------------------|
|   | Description I                    | <p>module 3</p> <ul style="list-style-type: none"> <li>• Using “explanation” during the doctor-patient talk for the purpose of shared decision making</li> <li>• Practicing “explanation” during the doctor-patient talk</li> </ul>                                                                                                                                                                                                                                                                                                                                               |
| 4 | Skills Training: Chest pain      | <ul style="list-style-type: none"> <li>• Targeted anamnesis and problem-oriented physical examination to differentiate “wait and watch” cases from “avertible dangerous courses of disease” regarding chest pain</li> <li>• Documentation and recognition of possible psychogenic causes of thoracic pain</li> <li>• Basic techniques for speaking about and verifying therapy with the patient in the case of chest pain</li> <li>• Explanation + emphasizing of prevention measures and early recognition of complications / chronic courses of disease / prevention</li> </ul> |
| 4 | General Practice Case Reflection | <ul style="list-style-type: none"> <li>• Shared case reflection</li> <li>• Theory: biographical anamnesis</li> <li>• Role playing to practice biographical anamnesis</li> </ul>                                                                                                                                                                                                                                                                                                                                                                                                   |
| 4 | Days at the teaching practice    | <p>Case issues involving chest pain:</p> <ul style="list-style-type: none"> <li>• Student observation with particular emphasis on the clinical picture of chest pain</li> <li>• Practical implementation of the examination techniques learned in the seminar:</li> </ul>                                                                                                                                                                                                                                                                                                         |

|  |  |                                                                                                                                                                                                            |
|--|--|------------------------------------------------------------------------------------------------------------------------------------------------------------------------------------------------------------|
|  |  | <p>palpation, percussion,<br/>auscultation of the thoracic<br/>organs</p> <ul style="list-style-type: none"><li>• Long-term monitoring: in-<br/>depth case history, treatment<br/>of the patient</li></ul> |
|--|--|------------------------------------------------------------------------------------------------------------------------------------------------------------------------------------------------------------|
